# Supplementary material for: The Effectiveness of Minimally Invasive Techniques in the Treatment of Patellar Tendinopathy: A Systematic Review and Meta-Analysis of Randomized Controlled Trials
Source: Evid Based Complement Alternat Med. 2020 Sep 5;2020:8706283. doi: 10.1155/2020/8706283 (PMC7492866; doi:10.1155/2020/8706283)
Supplement: Supplementary Materials — Appendix 1: search strategy in databases. Appendix 2: methodological quality scores using the PEDro scale. [file 8706283.f1.zip]

Archive with 2 entries (2 files):
- mat.8706283.v1 (2).docx
- Appendix 2. Methodological quality scores using PEDro scale.docx
